# Supplementary material for: Liver steatosis and metabolic dysfunction-associated fatty liver disease among HIV-positive and negative adults in urban Zambia
Source: PubMed Central journal article supplement (PMC9280874; doi:10.1136/bmjgast-2022-000945), 2022-07-13

**Appendix 1: STROBE Flow Chart of Study Participants**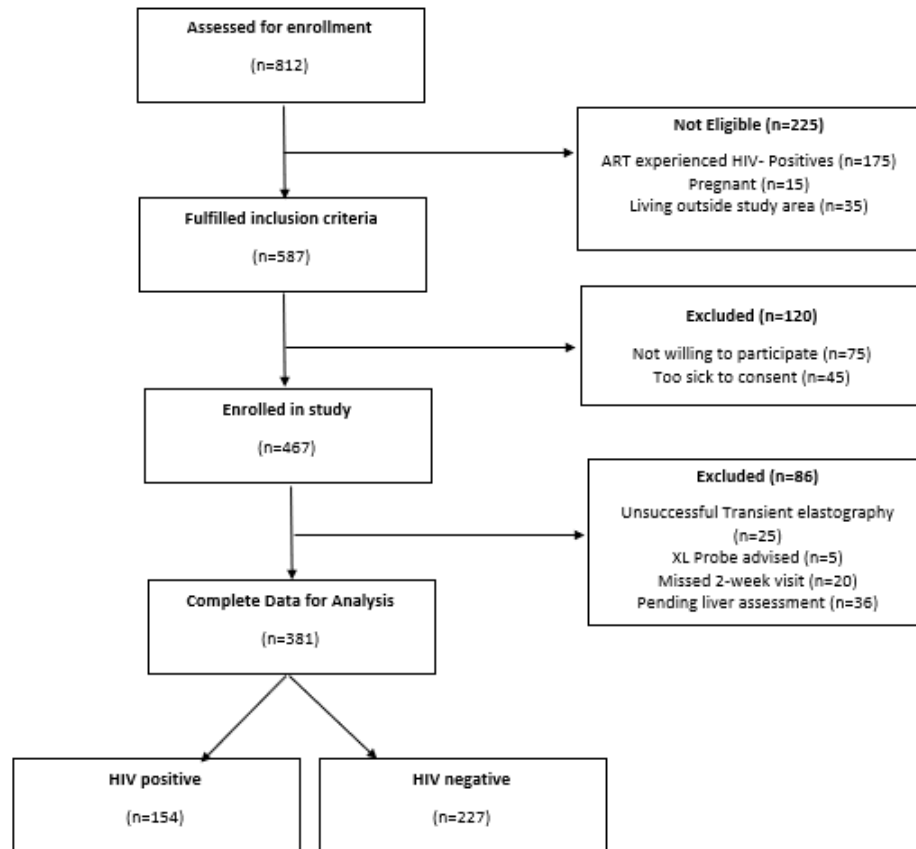

Supplement: bmjgast-2022-000945supp001.pdf [file bmjgast-2022-000945supp001.pdf]
